# Supplementary material for: TRPV4 activation triggers protective responses to bacterial lipopolysaccharides in airway epithelial cells
Source: PubMed Central journal article supplement (PMC5651912; doi:10.1038/s41467-017-01201-3), 2017-10-20
Supplement: 41467_2017_1201_MOESM1_ESM.pdf [file 41467_2017_1201_MOESM1_ESM.pdf]

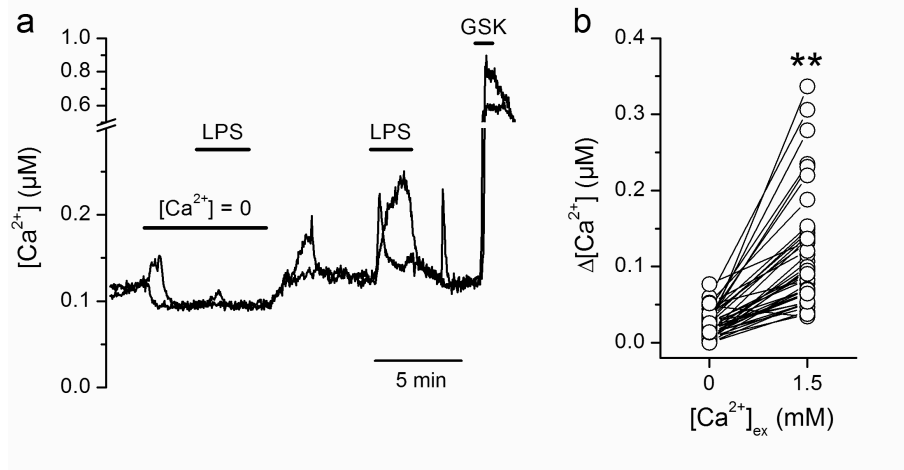

1  
 2 **Supplementary Figure 1. LPS-induced  $\text{Ca}^{2+}$  responses of mTEC require extracellular  $\text{Ca}^{2+}$ .**  
 3 (a) Representative effects of LPS on the intracellular  $\text{Ca}^{2+}$  concentration in freshly isolated cells, in the  
 4 absence and in the presence of extracellular  $\text{Ca}^{2+}$ . LPS, 20  $\mu\text{g}/\text{ml}$  and GSK1016790A, 10 nM. (b) Changes in  
 5 intracellular  $\text{Ca}^{2+}$  concentration recorded upon stimulation with LPS (20  $\mu\text{g ml}^{-1}$ ) in the absence of extracellular  
 6  $\text{Ca}^{2+}$  and after  $\text{Ca}^{2+}$  restitution. Each data point represents an individual cell in both conditions ( $n = 47$ ). \*\*,  $P <$   
 7 0.01, paired  $t$ -test.  
 8

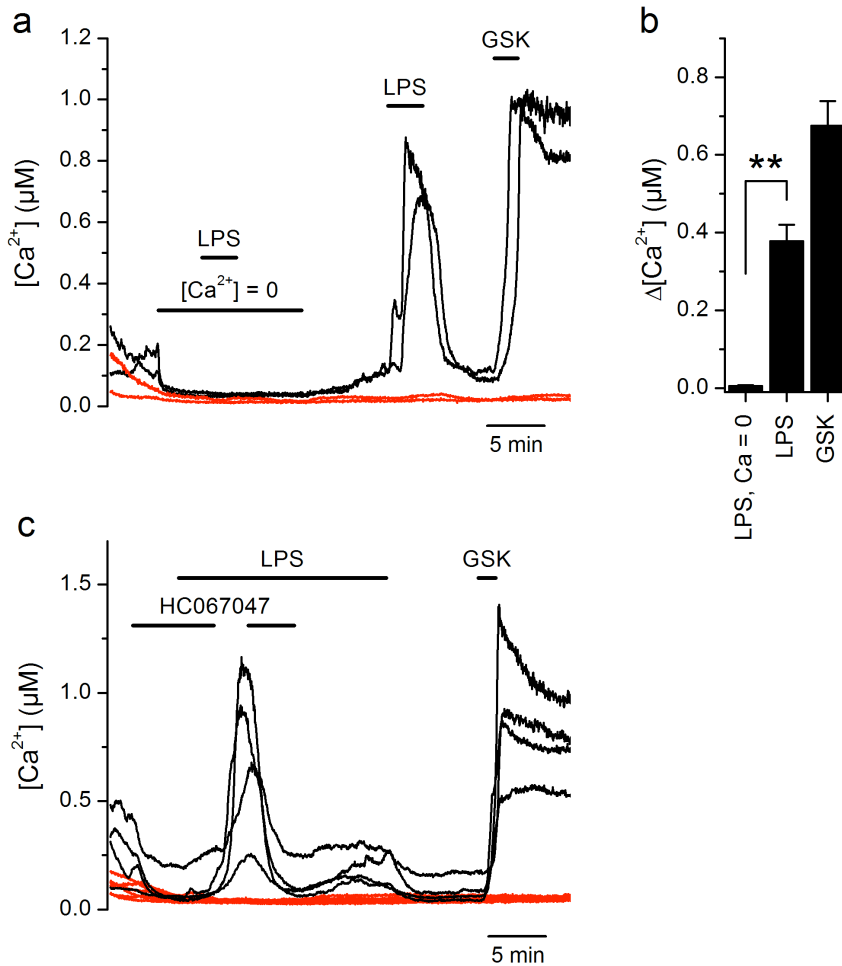

9

10 **Supplementary Figure 2. LPS induces  $Ca^{2+}$  influx through TRPV4 channels in HEK293T cells.**

11 **(a)** Representative traces of intracellular  $Ca^{2+}$  signals in TRPV4-transfected HEK293T cells (black traces)  
 12 showing the lack of LPS-induced responses in absence of extracellular  $Ca^{2+}$ . The red traces correspond to  
 13 non-transfected cells (unresponsive to GSK1016790A). **(b)** Average amplitudes of responses to LPS in the  
 14 absence extracellular  $Ca^{2+}$  and to LPS or GSK1016790A in the presence of extracellular  $Ca^{2+}$  ( $n = 85$ ). \*\*,  $P <$   
 15  $0.01$ , Dunn's multiple comparison test. **(c)** Intracellular  $Ca^{2+}$  signals in TRPV4-transfected HEK293T cells  
 16 (black traces) showing the inhibition of the responses elicited by LPS ( $20 \mu g ml^{-1}$ ) by the TRPV4 inhibitor  
 17 HC067047 ( $10 \mu M$ ). The red traces were recorded in non-transfected cells (unresponsive to GSK1016790A).

18

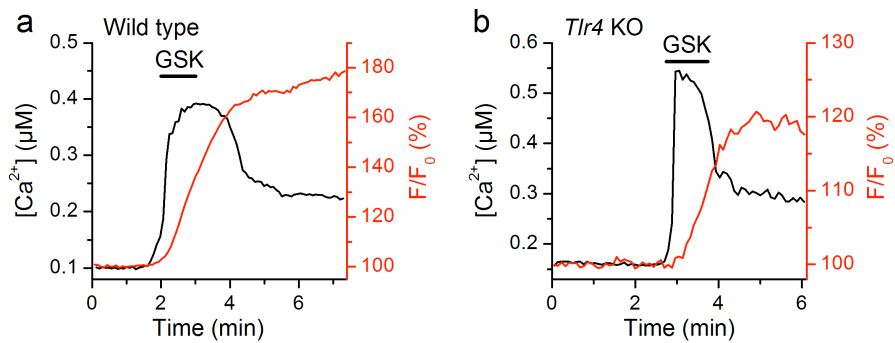

19

20 **Supplementary Figure 3. Activation of TRPV4 by GSK1016790A induces production of NO in mTEC.**

21 (a, b) Representative traces of concomitant intracellular Ca<sup>2+</sup> signals (black solid traces) and normalized  
 22 fluorescence of NO-sensitive dye DAF-FM (F/F<sub>0</sub>, red solid traces) recorded in mTEC harvested from wild type  
 23 (a) and *Tlr4* KO mice (b). GSK1016790A, 10 nM.

24

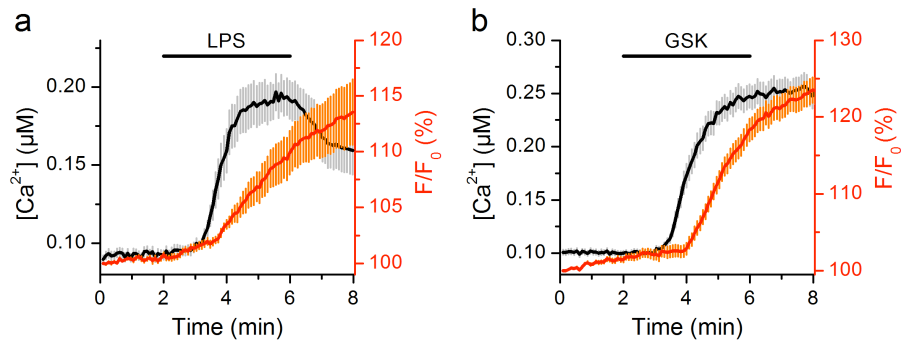

26

27 **Supplementary Figure 4. Activation of TRPV4 by GSK1016790A induces production of NO in human**  
28 **nasal epithelial cells.**

29 (a,b) Average intracellular  $\text{Ca}^{2+}$  signals (black solid traces) and normalized fluorescence of NO-sensitive dye  
30 DAF-FM ( $F/F_0$ , red solid traces) recorded in freshly isolated human nasal epithelial cells. LPS,  $20 \mu\text{g ml}^{-1}$ ;  
31 GSK1016790A (GSK) 10 nM).

32

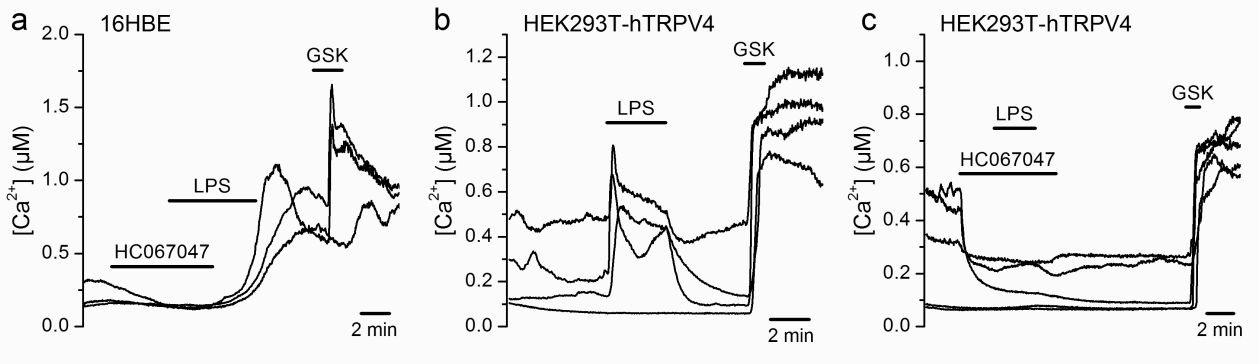

34

35 **Supplementary Figure 5. LPS-induced activation of human TRPV4 in native and in HEK293T cells.**

36 (a) Intracellular  $Ca^{2+}$  imaging experiments showing that the TRPV4 inhibitor HC067047 abrogates the  
 37 responses of 16HBE cells to LPS. (b) HEK293T cells transiently transfected with human TRPV4 are  
 38 stimulated by LPS. (c) HC067047 inhibits the responses of hTRPV4-transfected HEK293T cells to LPS. In all  
 39 panels, LPS  $20 \mu\text{g ml}^{-1}$ ; HC067047  $10 \mu\text{M}$ , and GSK1016790A (GSK)  $10 \text{ nM}$ .

40

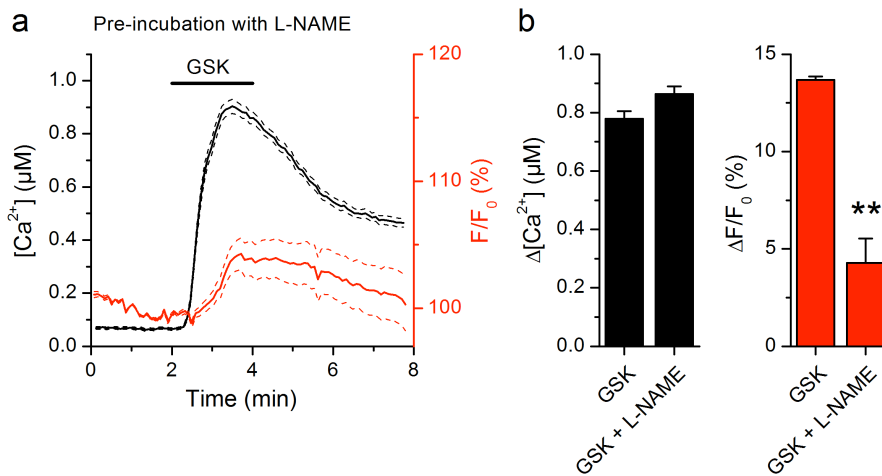

42

43 **Supplementary Figure 6. LPS-induced activation of TRPV4 elicits enzyme-driven NO production.**

44 (a) Average intracellular  $Ca^{2+}$  signals (black solid trace) and average normalized fluorescence of NO-sensitive  
 45 dye DAF-FM ( $F/F_0$ , red solid line) in 16HBE cells ( $n = 144$ ) showing the effects of application of the TRPV4  
 46 agonist GSK1016790A (GSK; 10 nM) in cells pre-incubated with the NOS inhibitor L-NAME (1 mM) ( $n = 249$ ).  
 47 The thin dashed traces represent the corresponding means  $\pm$  standard errors. (b) Average changes in  
 48 intracellular  $Ca^{2+}$  concentration (left panel) and NO production (right panel) induced by GSK in the absence ( $n$   
 49 = 144) or presence of L-NAME ( $n = 249$ ). \*\*,  $P < 0.01$ , Mann-Whitney  $U$  test.

50

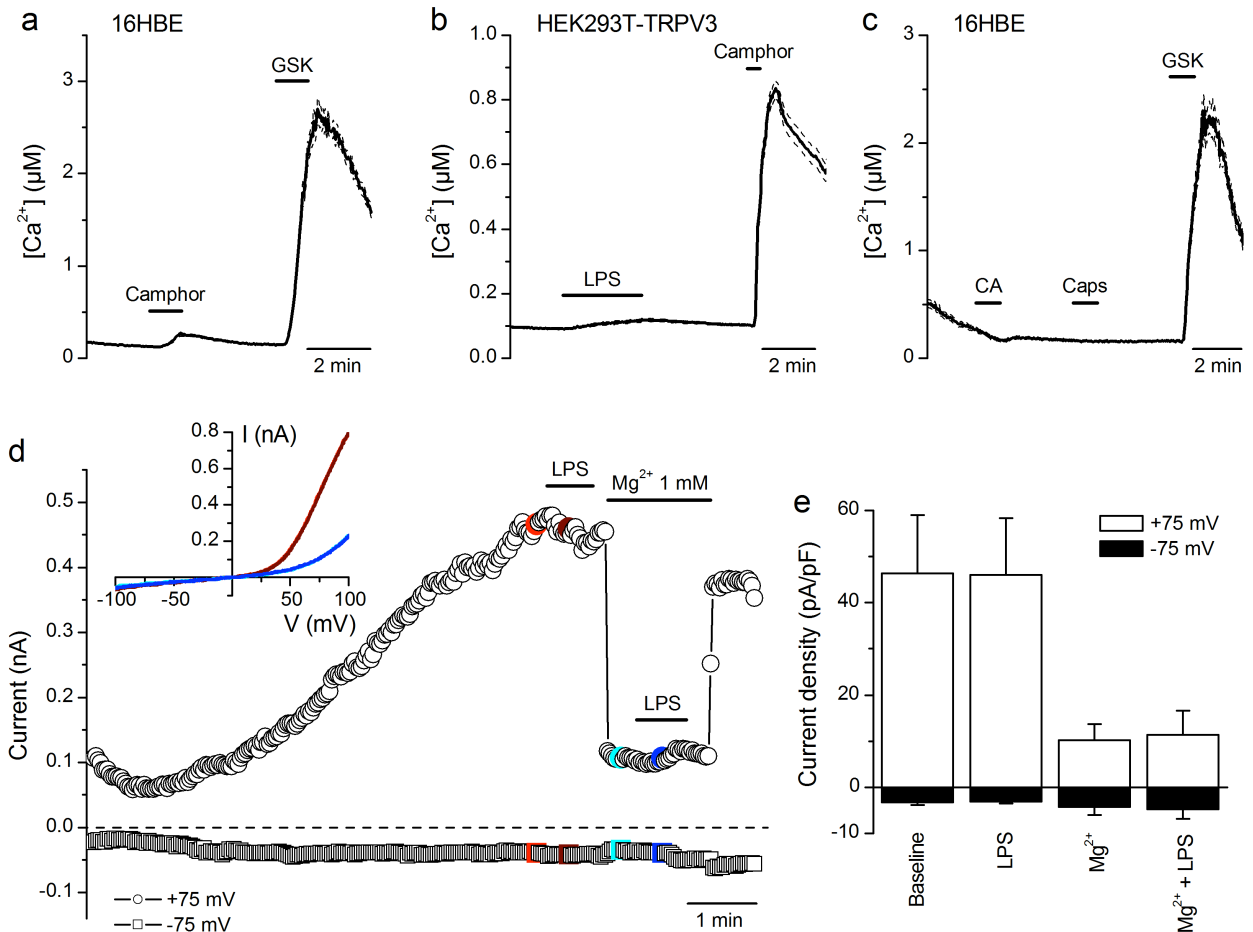

52

### 53 **Supplementary Figure 7. Expression of TRPV4 in human bronchial epithelial (16HBE) cells.**

54 (a) Average intracellular  $Ca^{2+}$  responses of 16HBE cells to the TRPV3 agonist camphor (10 mM) and to the  
 55 TRPV4 agonist GSK1016790A (GSK; 10 nM) (n = 210). (b) Average intracellular  $Ca^{2+}$  concentration recorded  
 56 in HEK293T cells transiently transfected with human TRPV3 (n = 163). These cells do not respond to LPS (20  
 57  $\mu g\ ml^{-1}$ ) but to the TRPV3 agonist camphor (10 mM). (c) Average intracellular  $Ca^{2+}$  concentration recorded in  
 58 16HBE cells (n = 156). These cells do not respond to the TRPA1 agonist cinnamaldehyde (CA, 300  $\mu M$ ) nor to  
 59 the TRPV1 agonist capsaicin (1  $\mu M$ ), but they respond to GSK1016790A. The thin dashed lines represent  
 60 mean  $\pm$  standard error. (d) Example of the effects of LPS on the amplitude of currents measured at +75 and  
 61 -75 mV in a HEK293T cell transfected with mTRPM7. The colored data points correspond to the traces shown  
 62 in the inset. (e) Average current density during baseline and LPS application in the absence or presence of  
 63 extracellular  $Mg^{2+}$  (n = 5).

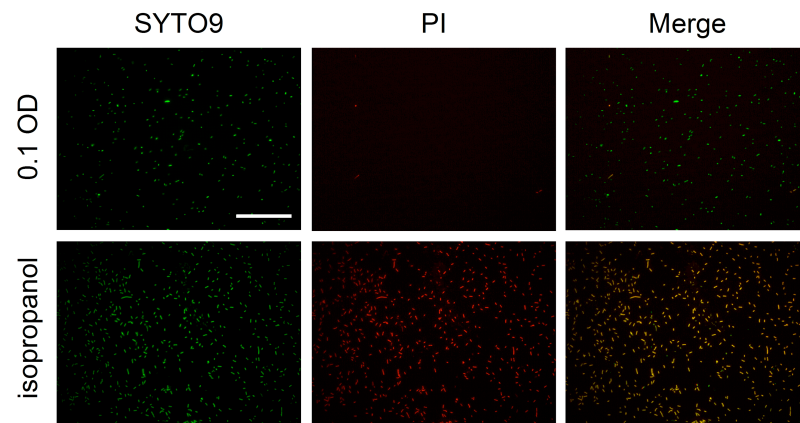

64

65 **Supplementary Figure 8. Quantification of basal and total cell death in 0.1 OD bacterial cultures.**

66 (a) Representative images of *E. coli* cultures stained with SYTO9 (green, all cells) or PI (red, dead cells).  
67 Magnification, x40. As a positive control to assess cell death, bacteria were grown until 0.1 OD and later  
68 incubated for 15 min in isopropanol. 0.1 OD corresponds to cells imaged immediately after the culture reached  
69 0.1 OD. Scale bar = 50  $\mu$ m.

70



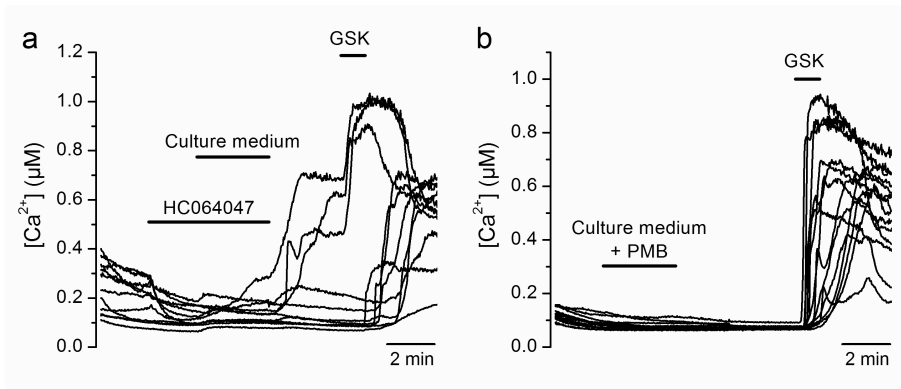

72

73 **Supplementary Figure 9. 0.1 OD cultures fail to activate TRPV4 in the presence of an TRPV4 antagonist**  
74 **or an LPS scavenger.**

75 (a,b) Representative traces of intracellular  $Ca^{2+}$  concentration in TRPV4-transfected HEK239T cells exposed  
76 to the supernatant of 0.1 OD culture of *E. coli* in the presence of HC067047 (10  $\mu M$ ) (a) or pre-incubated with  
77 polymyxin B (PMB, 300  $\mu g\ ml^{-1}$ ) (b). GSK1016790A, 10 nM.

78

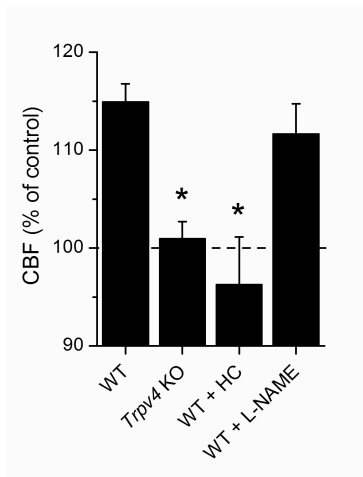

80

81 **Supplementary Figure 10. LPS increases cilia beat frequency in mTEC.**

82 Relative changes of cilia beat frequency (CBF) recorded upon LPS application to mTEC primary cultures  
83 obtained from wild type mice (WT), from *Trpv4* KO mice, or wild type mice in the presence of the TRPV4  
84 inhibitor HC067047 (10  $\mu$ M) or the presence of the non-selective NOS inhibitor L-NAME (1 mM). \*,  $P < 0.05$ ,  
85 Dunn's multiple comparison test.

86

87

88

89

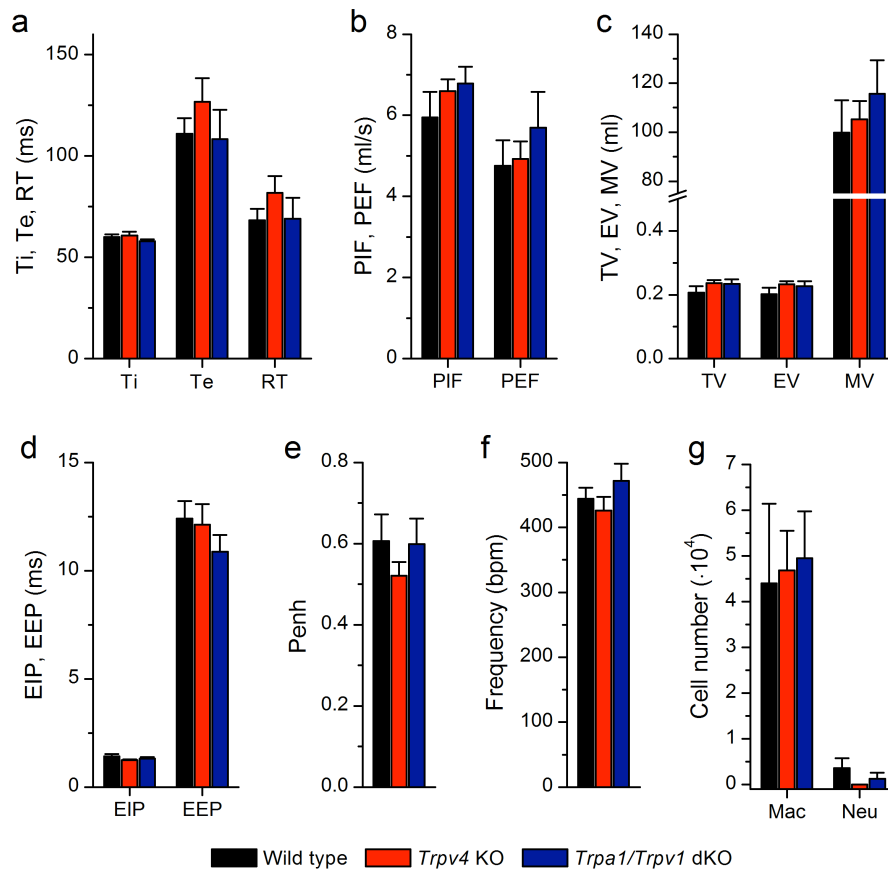

91

92 **Supplementary Figure 11. Basal ventilatory parameters and airway polymorphonuclear leukocytes in**  
 93 **wild type and *Trpv4* KO mice.**

94 (a-f) Average basal values of ventilatory parameters in WT (n = 10), *Trpv4* KO (n = 7) and *Trpa1/Trpv1* double  
 95 KO (n = 7) mice. (g) Average number of macrophages (Mac) and neutrophils (Neu) in the bronchoalveolar  
 96 lavage fluid of untreated WT, *Trpv4* KO and *Trpa1/Trpv1* double KO animals (n = 5 per genotype).

97

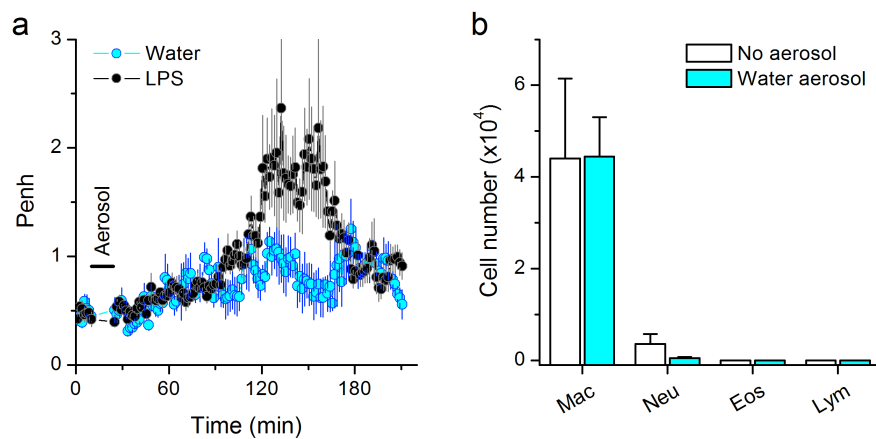

99

100 **Supplementary Figure 12. Ventilatory parameters and airway polymorphonuclear leukocytes in**  
 101 **untreated and LPS-treated wild type mice.**

102 **(a)** Time course of average enhanced pause (Penh) determined in unrestrained whole-body plethysmography  
 103 experiments performed in wild type mice aerosolized with water during 15 min (n = 5, light blue traces). The  
 104 data obtained from wild type mice receiving 50  $\mu\text{g ml}^{-1}$  LPS aerosol (same as in Figure 7a) are shown for  
 105 comparison. Data is represented as mean (symbols)  $\pm$  standard errors (error bars). **(b)** Average number of  
 106 leukocytes found in the bronchoalveolar lavage fluid collected from untreated and water-treated mice.

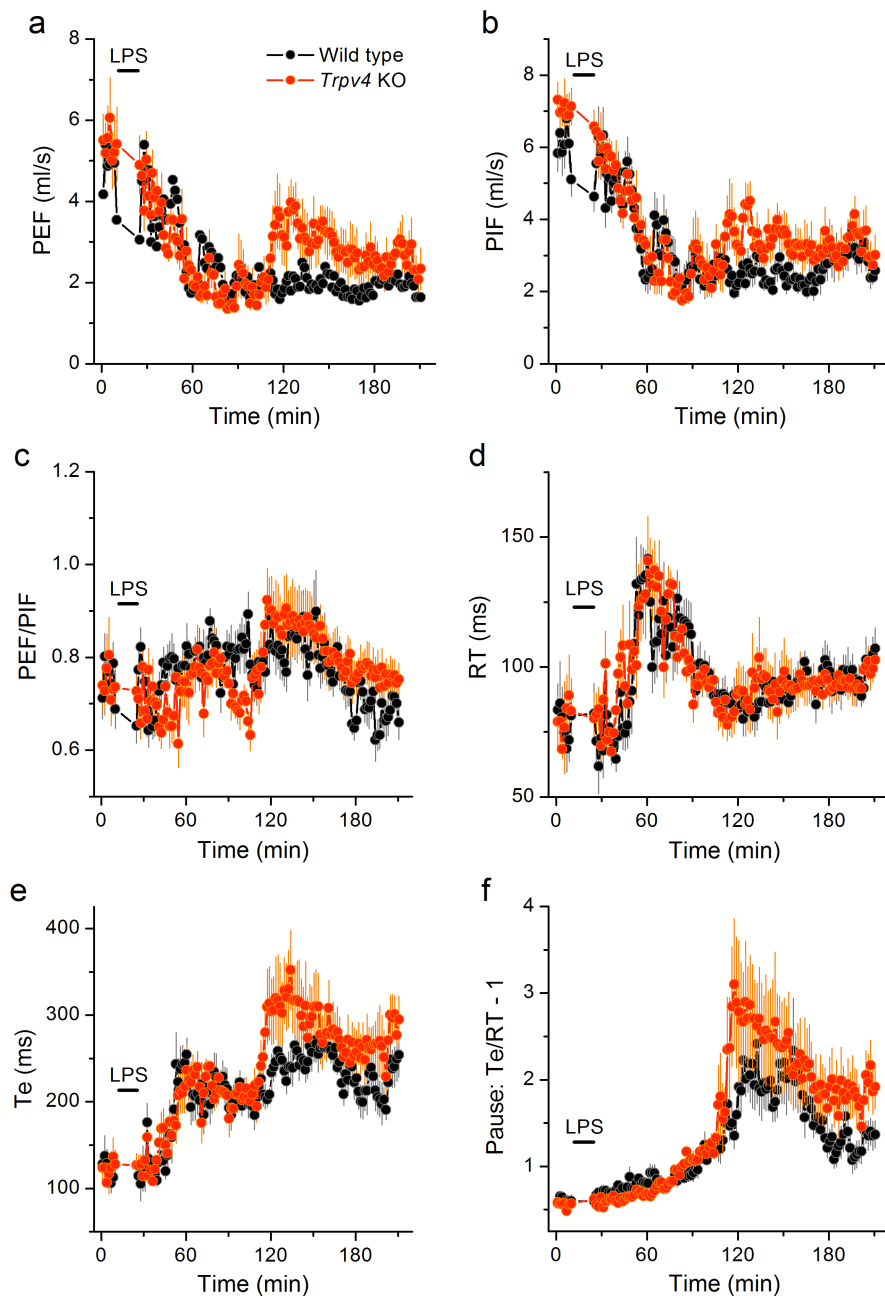

107

108 **Supplementary Figure 13. Analysis of ventilation parameters defining the enhanced pause.**

109 (a-f) Average values of parameters defining the Penh curves shown in Figure 7a. PEF, peak expiratory flow;  
 110 PIF, peak inspiratory flow; RT, relaxation time and Te, time of expiration. Mice were exposed to aerosols  
 111 containing  $50 \mu\text{g ml}^{-1}$  LPS for 15 min, as indicated by the horizontal line. The Penh factors PEF/PIF (panel C)  
 112 and Pause (=  $\text{Te}/\text{RT} - 1$ ; panel F) are represented to facilitate the visualization of their individual contribution to  
 113 Penh. Data is represented as mean (filled symbols)  $\pm$  standard error (error bars). Note that the change in Te is  
 114 the major contributor to the difference in Penh response between wild type and *Trpv4* mice.  $\text{Penh} =$   
 115  $(\text{PEF}/\text{PIF}) \cdot \text{Pause} = (\text{PEF}/\text{PIF}) \cdot (\text{Te}/\text{RT} - 1)$ .

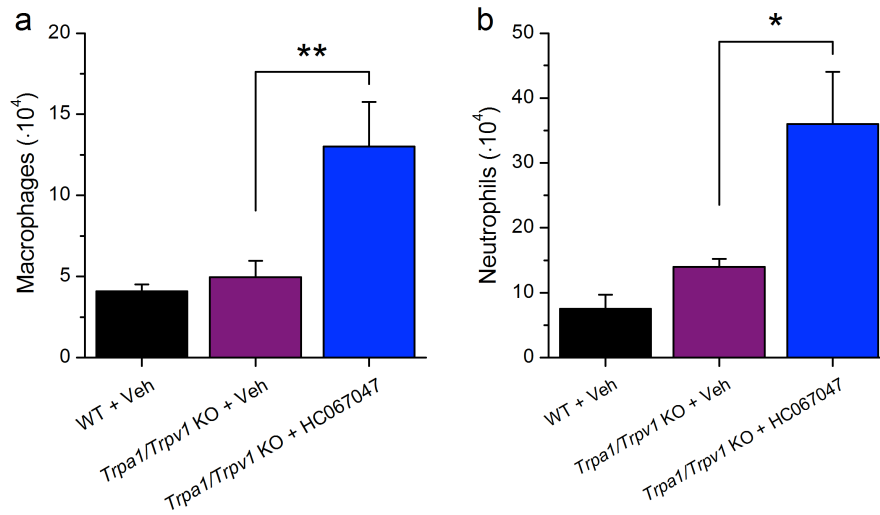

116

117 **Supplementary Figure 14. Airway cellular inflammatory response to LPS in *Trpa1/Trpv1* KO mice.**

118 (a, b) Average number of macrophages (a) and neutrophils (b) in the bronchoalveolar lavage fluid collected 3  
 119 h after LPS exposure ( $50 \mu\text{g ml}^{-1}$ , 15 min). WT + Veh, wild type mice pretreated with vehicle (0.8%  
 120 DMSO),  $n = 7$ ; *Trpa1/Trpv1* KO + Veh, *Trpa1/Trpv1* KO pretreated with vehicle,  $n = 6$ ; *Trpa1/Trpv1*  
 121 + HC067047, *Trpa1/Trpv1* KO pretreated with the TRPV4 inhibitor HC067047 ( $10 \text{ mg kg}^{-1}$  in 0.8%  
 122 DMSO),  $n = 6$ . Veh, vehicle. \*,  $P < 0.05$ ; \*\*,  $P < 0.01$ ; two-tailed  $t$ -test.

123

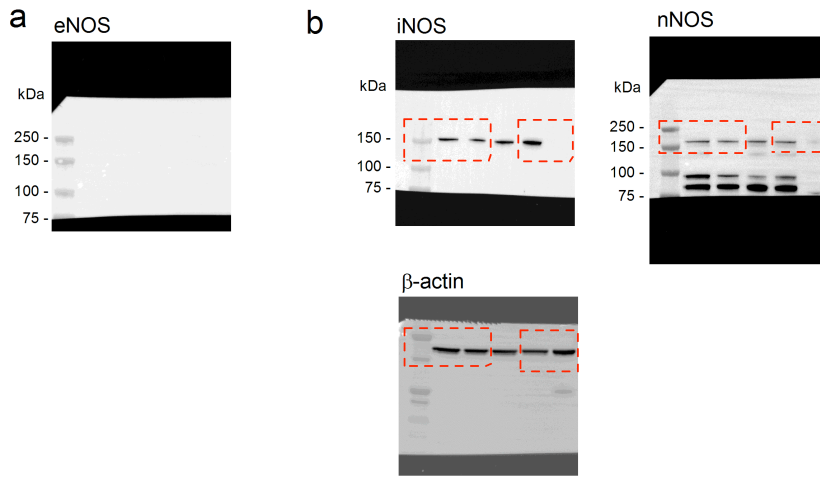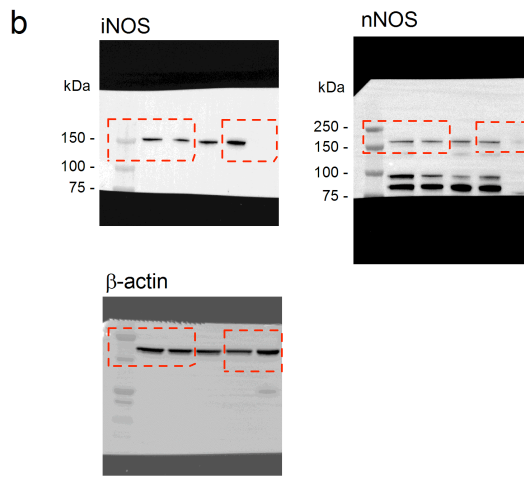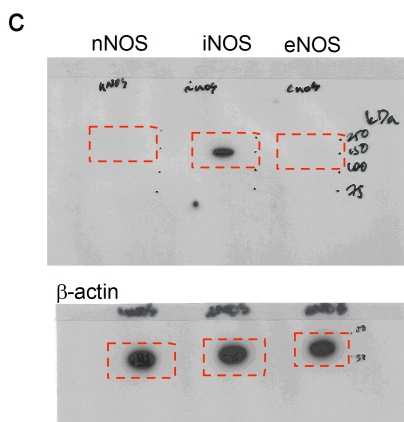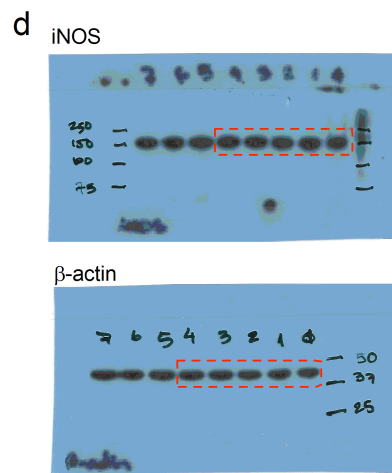

124

125 **Supplementary Figure 15. Original scans of Western blots.** (a) Western blot of mTEC lysates probed for

126 the eNOS. (b-d) Uncropped scans corresponding to images shown in Figure 4g (b), Figure 5a (c) and Figure

127 5c (d).

128
